# Supplementary material
Source: MDPI journal article supplement (https://www.mdpi.com/2071-1050/10/11/4118)
Supplement: s1 [file s1]

## S1. ABAQUS model geometry

### S1.1. Compression on the Y-axis

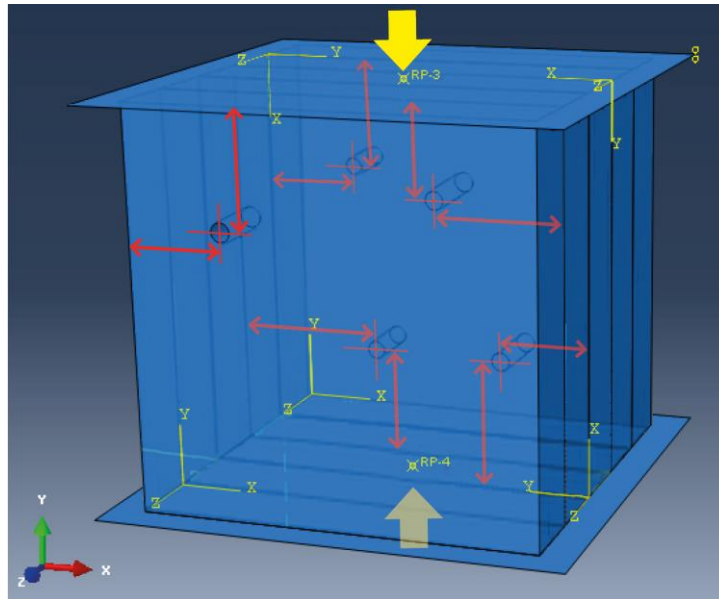

**Figure S1.** Compression specimen; lamella dimensions – Length = 85 mm; Width = 85 mm; Thickness = 17 mm; defect dimensions off sides (as Table 2 column 4) shown in red line, rotated 90° for each lamella to avoid their coincidence, i.e., are measured from the following sides: front lamella – LHS and top; second lamella – top and RHS; third lamella – RHS and bottom; fourth lamella – bottom and LHS; rear lamella – LHS and top.

### S1.2. Out-of-plane Bending of the Panel's X-axis around the Y-axis

Run Q: Single large hole located at centre of span

Single large central hole in outer lamellae; hole properties – diameter = 15 mm centred at 410 mm and 25.5 mm from the outer edges.

Run R: Single large hole located off-centre of span

Single large shifted hole in both outer lamella; hole properties – diameter = 15 mm centred at 300 mm and 25.5 mm from the outer edges.

Run S: Miscellaneous spread out holes in all lamellae

Spread of holes as Table S1 and S2.

**Table S1.** Defect table: bottom lamella (all dimensions in mm).

|           |        |     |     |        |     |        |
|-----------|--------|-----|-----|--------|-----|--------|
| Diameter  | 4      | 10  | 2.8 | 6      | 11  | 4      |
| Thickness | HB, IF | T   | T   | HB, IF | T   | HB, OF |
| X_centre  | 40     | 250 | 400 | 440    | 620 | 670    |
| Y_centre  | 21     | 25  | 30  | 31     | 11  | 21     |

X\_centre, Y\_centre from LHS edge

T=Through thickness of lamella; HB= half-blind (hole only going through half the lamella thickness)

IF=Inner Face (stuck to middle lamella) ; OF=Outer Face (external to whole assembly).

**Table S2.** Defect table: middle lamella (all dimensions in mm).

|           |        |     |     |        |     |        |
|-----------|--------|-----|-----|--------|-----|--------|
| Diameter  | 4      | 6   | 6   | 4      | 10  | 4      |
| Thickness | HB, BF | T   | T   | HB, FF | T   | HB, FF |
| X_centre  | 150    | 200 | 380 | 420    | 570 | 780    |
| Y_centre  | 30     | 40  | 20  | 21     | 26  | 30     |

BF: Back face, FF: Front face.

Top lamella: same as bottom lamella but rotated around Y\_axis by 180°.

Run T: Miscellaneous holes centrally clustered in all lamellae

Spread of holes as Table S3 and S4.

**Table S3.** Defect table: bottom lamella (all dimensions in mm).

|           |        |     |     |        |        |     |
|-----------|--------|-----|-----|--------|--------|-----|
| Diameter  | 4      | 6   | 10  | 4      | 4      | 6   |
| Thickness | HB, IF | T   | T   | HB, IF | HB, OF | T   |
| X_centre  | 300    | 350 | 370 | 400    | 420    | 440 |
| Y_centre  | 21     | 11  | 30  | 25     | 21     | 31  |

X\_centre, Y\_centre from LHS edge.

T=Through thickness of lamella; HB= half-blind (hole only going through half the lamella thickness)

IF=Inner Face (stuck to middle lamella); OF=Outer Face (external to whole assembly).

**Table S4.** Middle lamella (all dimensions in mm).

|           |     |        |     |     |        |        |
|-----------|-----|--------|-----|-----|--------|--------|
| Diameter  | 6   | 4      | 6   | 10  | 4      | 4      |
| Thickness | T   | HB, BF | T   | T   | HB, FF | HB, FF |
| X_centre  | 300 | 350    | 380 | 410 | 450    | 500    |
| Y_centre  | 40  | 30     | 20  | 26  | 20     | 30     |

BF: Back face, FF: Front face.

Top lamella: same as bottom lamella but rotated around Y\_axis by 180°.
